# Supplementary material
Source: PubMed Central journal article supplement (PMC7449223)
Supplement: AAC.00852-20-s0001.pdf [file AAC.00852-20-s0001.pdf]

**Table S1.** Identification of the 37 *aac(3)-IIg*-positive *E. cloacae* complex isolates based on *hsp60* and *rpoB* sequences

| Isolates | <i>hsp60</i> genotyping                                 | <i>rpoB</i> genotyping            |
|----------|---------------------------------------------------------|-----------------------------------|
| Y3       | <i>E. hormaechei</i> subsp. <i>steigerwaltii</i>        | <i>E. hormaechei</i>              |
| Y4       | <i>E. hormaechei</i> subsp. <i>steigerwaltii</i>        | <i>E. hormaechei</i>              |
| Y7       | <i>E. hormaechei</i> subsp. <i>steigerwaltii</i>        | <i>E. hormaechei</i>              |
| Y8       | <i>E. hormaechei</i> subsp. <i>steigerwaltii</i>        | <i>E. hormaechei</i>              |
| Y10      | <i>E. hormaechei</i> subsp. <i>Oharae</i>               | <i>E. hormaechei</i>              |
| Y24      | <i>E. hormaechei</i> subsp. <i>steigerwaltii</i>        | <i>E. hormaechei</i>              |
| Y40      | <i>E. hormaechei</i> subsp. <i>steigerwaltii</i>        | <i>E. hormaechei</i>              |
| Y43      | <i>E. hormaechei</i> subsp. <i>steigerwaltii</i>        | <i>E. hormaechei</i>              |
| Y59      | <i>E. hormaechei</i> subsp. <i>steigerwaltii</i>        | <i>E. hormaechei</i>              |
| Y67      | <i>E. hormaechei</i> subsp. <i>steigerwaltii</i>        | <i>E. hormaechei</i>              |
| Y75      | <i>E. hormaechei</i> subsp. <i>steigerwaltii</i>        | <i>E. hormaechei</i>              |
| Y81      | <i>E. kobe</i> <sup>a</sup>                             | <i>E. cloacae</i> IV <sup>a</sup> |
| Y88      | <i>E. hormaechei</i> subsp. <i>steigerwaltii</i>        | <i>E. hormaechei</i>              |
| Y108     | <i>E. hormaechei</i> subsp. <i>Oharae</i>               | <i>E. hormaechei</i>              |
| Y118     | <i>E. hormaechei</i> subsp. <i>steigerwaltii</i>        | <i>E. hormaechei</i>              |
| Y129     | <i>E. hormaechei</i> subsp. <i>steigerwaltii</i>        | <i>E. hormaechei</i>              |
| Y130     | <i>E. hormaechei</i> subsp. <i>steigerwaltii</i>        | <i>E. hormaechei</i>              |
| Y131     | <i>E. hormaechei</i> subsp. <i>steigerwaltii</i>        | <i>E. hormaechei</i>              |
| Y137     | <i>E. hormaechei</i> subsp. <i>Oharae</i>               | <i>E. hormaechei</i>              |
| Y150     | <i>E. hormaechei</i> subsp. <i>steigerwaltii</i>        | <i>E. hormaechei</i>              |
| Y165     | <i>E. hormaechei</i> subsp. <i>Oharae</i>               | <i>E. hormaechei</i>              |
| Y176     | <i>E. hormaechei</i> subsp. <i>steigerwaltii</i>        | <i>E. hormaechei</i>              |
| Y178     | <i>E. hormaechei</i> subsp. <i>steigerwaltii</i>        | <i>E. hormaechei</i>              |
| Y184     | <i>E. asburiae</i>                                      | <i>E. asburiae</i>                |
| Y233     | <i>E. hormaechei</i> subsp. <i>steigerwaltii</i>        | <i>E. hormaechei</i>              |
| Y243     | <i>E. hormaechei</i> subsp. <i>steigerwaltii</i>        | <i>E. hormaechei</i>              |
| Y249     | <i>E. cloacae</i> subsp. <i>dissolvens</i> <sup>a</sup> | <i>E. asburiae</i> <sup>a</sup>   |
| Y261     | <i>E. hormaechei</i> subsp. <i>steigerwaltii</i>        | <i>E. hormaechei</i>              |
| Y274     | <i>E. hormaechei</i> subsp. <i>steigerwaltii</i>        | <i>E. hormaechei</i>              |
| Y295     | <i>E. hormaechei</i> subsp. <i>steigerwaltii</i>        | <i>E. hormaechei</i>              |
| Y308     | <i>E. asburiae</i>                                      | <i>E. asburiae</i>                |
| Y315     | <i>E. hormaechei</i> subsp. <i>steigerwaltii</i>        | <i>E. hormaechei</i>              |
| Y320     | <i>E. hormaechei</i> subsp. <i>Oharae</i>               | <i>E. hormaechei</i>              |
| Y323     | <i>E. hormaechei</i> subsp. <i>Oharae</i>               | <i>E. hormaechei</i>              |
| Y324     | <i>E. kobe</i> <sup>a</sup>                             | <i>E. cloacae</i> IV <sup>a</sup> |
| Y327     | <i>E. kobe</i> <sup>a</sup>                             | <i>E. cloacae</i> IV <sup>a</sup> |
| Y2152    | <i>E. hormaechei</i> subsp. <i>Oharae</i>               | <i>E. hormaechei</i>              |

<sup>a</sup> Identification with sequences of *hsp60* and *rpoB* are conflicting with each other.

**Table S2.** Primers used in this study

| Primers                                                | Sequences (5' to 3')                                                          | Use                                             |
|--------------------------------------------------------|-------------------------------------------------------------------------------|-------------------------------------------------|
| aac(3)-Ilg-F<br>aac(3)-Ilg-R                           | AACAATTGCGGCGGACCTTTCACG<br>CGCTGCGGATCGGCATTTCTAGC                           | Screening for<br><i>aac(3)-Ilg</i>              |
| strA-F<br>strA-R                                       | GTGGCTTGCCCCGAGGTGATCA<br>CCAAGTCAGAGGGTCCAATC                                | Screening for <i>strA</i>                       |
| strB-F<br>strB-R                                       | ATCGTCAAGGGATTGAAACC<br>GGATCGTAGAACATATTGGC                                  | Screening for <i>strB</i>                       |
| aadA5-F<br>aadA5-R                                     | GATCGAGCGCCATCTGGCTG<br>ACGTTCCGCTCGTCACCCTT                                  | Screening for<br><i>aadA5</i>                   |
| aac(6')-Ilc-F<br>aac(6')-Ilc-R                         | CATGCTTGGCTGAACCGCC<br>CCGGCCTTCTCGTAGCA                                      | Screening for<br><i>aac(6')-Ilc</i>             |
| aadA1-F<br>aadA1-R                                     | CAACGATGTTACGCAGCAGG<br>ATGTCATTGCGCTGCCATTC                                  | Screening for<br><i>aadA1</i>                   |
| aphA-1-F<br>aphA-1-R                                   | ATGGGCTCGCGATAATGTC<br>CTCACCGAGGCAGTTCCAT                                    | Screening for<br><i>aphA-1</i>                  |
| aac(3)-Ild-F<br>aac(3)-Ild-R                           | GGCAATAACGGAGGCGCTTCAAAA<br>TTCCAAGCATCGGCATCTCATACG                          | Screening for<br><i>aac(3)-Ild</i>              |
| aadA2-F<br>aadA2-R                                     | CATTGAGCGCCATCTGGAAT<br>ACATTTGCTCATCGCCGGC                                   | Screening for<br><i>aadA2</i>                   |
| armA-F<br>armA-R                                       | AGGTTGTTTCCATTTCTGAG<br>TCTCTTCCATTCCCTTCTCC                                  | Screening for <i>armA</i>                       |
| aadB-F<br>aadB-R                                       | GTGTAACACGCAAGCACGATGATATTGATCTG<br>CGAGCCTGTAGGACTCTATGTGCTTTGTAGG           | Screening for <i>aadB</i>                       |
| rmtB-F<br>rmtB-R                                       | GCTTTCTGCGGGCGATGTAA<br>ATGCAATGCCGCGCTCGTAT                                  | Screening for <i>rmtB</i>                       |
| aac(6')-Ile-aph(2'')-Ia-F<br>aac(6')-Ile-aph(2'')-Ia-R | TTGAAATAATCGGTAGTGGTTATGATAGTGTG<br>GCA<br>CCCTCAAAAACCTGTTGTTGCATTTAGTCTTTCC | Screening for<br><i>aac(6')-Ile-aph(2'')-Ia</i> |
| Pro-aac(3)-Ilg-F<br>Pro-aac(3)-Ilg-R                   | CAGATCCAGCAGTCTGC<br>ATCAGGGCGAGCCAAAGTGC                                     | Cloning of <i>aac(3)-Ilg</i>                    |

**Table S2**, continued

| Primers                                                                        | Sequences (5' to 3')                                    | Use                                        |
|--------------------------------------------------------------------------------|---------------------------------------------------------|--------------------------------------------|
| Pro-strA-F<br>Pro-strA-R                                                       | CAGATCCAGCAGTCTGC<br>ATCAGGGCGAGCCAAAGTGC               | Cloning of <i>strA</i>                     |
| Pro-strB-F<br>Pro-strB-R                                                       | CGAACGAGAGCTACCGGT<br>CGCTTGATATCTAGTATGACGTCTG         | Cloning of <i>strB</i>                     |
| Pro-aadA5-F<br>Pro-aadA5-R                                                     | TTGAAGTCGAAGGTGATATC<br>GCTCAACGCAAGATTCT               | Cloning of <i>aadA5</i>                    |
| Pro-aac(6')-IIC -F<br>Pro-aac(6')-IIC -R                                       | ACAGTCTATGCCTCGGGCA<br>GCCATTCATGACCACTTCCCC            | Cloning of <i>aac(6')-IIC</i>              |
| Pro-aadA1-F<br>Pro-aadA1-R                                                     | ACTTCGCTGCTGCCCAA<br>TTATTTGCCGACTACCTTGGTG             | Cloning of <i>aadA1</i>                    |
| Pro- <i>aphA-1</i> -F<br>Pro- <i>aphA-1</i> -R                                 | GCCTGAAAACACAACCCGCTAC<br>CTCTGCCAGTGTTACAACC           | Cloning of <i>aphA-1</i>                   |
| Pro-aac(3)-IId-F<br>Pro-aac(3)-IId-R                                           | GGATGATAAGTTTATCACCACCG<br>CTAACCTGAAGGCTCGCAAG         | Cloning of <i>aac(3)-IId</i>               |
| Pro-aadA2-F<br>Pro-aadA2-R                                                     | AAGCAGCTATCGTTTTTGCAGTG<br>CGGCTTGAACGAATTGTTAGACATC    | Cloning of <i>aadA2</i>                    |
| Pro- <i>armA</i> -F<br>Pro- <i>armA</i> -R                                     | CTGGCTGGCGTGAAGGTGATGAACAA<br>TTATTTCTGAAATCCACTAG      | Cloning of <i>armA</i>                     |
| Pro-aadB-F<br>Pro-aadB-R                                                       | AAATGCCTCGACTTCGCTGC<br>GGACGAATTGTTAGGCCGCATATC        | Cloning of <i>aadB</i>                     |
| Pro- <i>rmtB</i> -F<br>Pro- <i>rmtB</i> -R                                     | GATTAAGCATTGGTAACTGTCAGACC<br>CCTTCTGATTGGCTTATCCATTC   | Cloning of <i>rmtB</i>                     |
| Pro-aac(6')-Ie- <i>aph(2'')</i> -Ia-F<br>Pro-aac(6')-Ie- <i>aph(2'')</i> -Ia-R | GACCTGATGGAAAAACAATG<br>CCATCTTTCCACTTCCTTT             | Cloning of <i>aac(6')-Ie-aph(2'')</i> -Ia  |
| <i>aac(3)</i> -Ilg-probe-F<br><i>aac(3)</i> -Ilg-probe-R                       | ATGAACACAAGGGAAACAATTGCGG<br>TCAGGGCGAGCCAAAGTGCCGTTGAA | Generating <i>aac(3)</i> -Ilg probe        |
| <i>hsp60</i> -F<br><i>hsp60</i> -R                                             | GGTAGAAGAAGGCGTGGTTGC<br>ATGCATTCGGTGGTGATCATCAG        | Sequence analysis of the <i>hsp60</i> gene |
| <i>rpoB</i> -F<br><i>rpoB</i> -R                                               | AACCAGTTCCGCGTTGGCCTGG<br>CCTGAACAACACGCTCGGA           | Sequence analysis of the <i>rpoB</i> gene  |

**Table S3.** Antibiotic susceptibilities of the 37 *aac(3)-IIg*-positive *E. cloacae* complex isolates, transconjugants and the recipient control *E. coli* C600

| Strains* | MIC ( $\mu\text{g/mL}$ ) |          |     |          |          |            |            |            |            |       |          |
|----------|--------------------------|----------|-----|----------|----------|------------|------------|------------|------------|-------|----------|
|          | GEN                      | KAN      | STR | SPE      | AMK      | TOB        | NEO        | SIS        | MCR        | NET   | RIB      |
| C600     | $\leq 0.25$              | $\leq 1$ | 2   | 4        | $\leq 1$ | $\leq 0.5$ | $\leq 0.5$ | $\leq 0.5$ | $\leq 0.5$ | 0.5   | $\leq 2$ |
| Y4       | 64                       | 512      | 128 | 16       | $\leq 1$ | 8          | 32         | 128        | 512        | 0.5   | 1024     |
| JY4      | 64                       | 512      | 256 | 8        | $\leq 1$ | 4          | 64         | 128        | 64         | 0.5   | >1024    |
| Y8       | 128                      | 512      | 256 | 8        | 16       | 64         | 32         | 512        | 512        | 128   | 1024     |
| JY8      | 64                       | 512      | 256 | 4        | 4        | 16         | 32         | 128        | 256        | 32    | >1024    |
| Y10      | 128                      | 128      | 128 | 16       | 8        | 64         | 4          | 256        | 1024       | 128   | 512      |
| JY10     | 64                       | 32       | 128 | 2        | $\leq 1$ | 16         | 1          | 128        | 128        | 16    | 64       |
| Y24      | 128                      | 512      | 128 | 16       | 8        | 64         | 32         | 512        | 512        | 64    | 1024     |
| JY24     | 64                       | 512      | 256 | 4        | 2        | 32         | 32         | 64         | 128        | 16    | >1024    |
| Y40      | 128                      | 512      | 128 | 16       | 8        | 64         | 32         | 512        | 1024       | 128   | >1024    |
| JY40     | 64                       | 512      | 256 | 4        | 4        | 32         | 32         | 128        | 256        | 32    | >1024    |
| Y43      | 128                      | 512      | 128 | 16       | 8        | 64         | 32         | 256        | 512        | 64    | 1024     |
| JY43     | 32                       | 1024     | 256 | 4        | 8        | 32         | 32         | 128        | 256        | 32    | >1024    |
| Y59      | 128                      | 512      | 128 | 16       | 8        | 64         | 32         | 256        | 512        | 64    | 1024     |
| JY59     | 64                       | 512      | 256 | 16       | 8        | 64         | 64         | 128        | 256        | 32    | >1024    |
| Y67      | 1024                     | 256      | 128 | 8        | 16       | 128        | 16         | >1024      | >1024      | 64    | 1024     |
| JY67     | 128                      | 512      | 128 | 4        | 4        | 32         | 32         | 256        | 256        | 16    | >1024    |
| Y75      | 128                      | 512      | 256 | 16       | 8        | 64         | 64         | 512        | 512        | 128   | >1024    |
| JY75     | 64                       | 512      | 256 | 4        | 8        | 16         | 64         | 128        | 256        | 32    | >1024    |
| Y81      | 128                      | 512      | 128 | 16       | 16       | 64         | 64         | 512        | 512        | 256   | >1024    |
| JY81     | 64                       | 512      | 256 | 4        | 4        | 16         | 32         | 128        | 256        | 32    | >1024    |
| Y88      | 128                      | 64       | 128 | 16       | 8        | 64         | 2          | 128        | 512        | 64    | 256      |
| JY88     | 64                       | 128      | 256 | 4        | 8        | 32         | 8          | 128        | 256        | 32    | 256      |
| Y108     | 128                      | 64       | 128 | 16       | 8        | 64         | 2          | 256        | 512        | 128   | 512      |
| JY108    | 64                       | 32       | 256 | 4        | 2        | 32         | 1          | 128        | 256        | 32    | 128      |
| Y118     | 128                      | 128      | 128 | 16       | 16       | 64         | 16         | 256        | 512        | 128   | 512      |
| JY118    | 64                       | 32       | 128 | $\leq 1$ | $\leq 1$ | 16         | 1          | 64         | 256        | 16    | 64       |
| Y129     | 128                      | 512      | 128 | 16       | 8        | 64         | 32         | 512        | 512        | 64    | 1024     |
| JY129    | 64                       | 512      | 256 | 4        | 2        | 32         | 32         | 64         | 256        | 16    | >1024    |
| Y130     | 128                      | 512      | 128 | 16       | 8        | 64         | 64         | 512        | 512        | 64    | 1024     |
| JY130    | 64                       | 512      | 256 | 4        | 2        | 32         | 32         | 128        | 256        | 32    | >1024    |
| Y131     | 128                      | 512      | 128 | 16       | 8        | 32         | 32         | 512        | 512        | 64    | 1024     |
| JY131    | 64                       | 512      | 256 | 4        | 2        | 32         | 32         | 128        | 128        | 16    | >1024    |
| Y165     | 128                      | 512      | 128 | 2        | 16       | 64         | 32         | 256        | 1024       | 64    | >1024    |
| JY165    | 32                       | 512      | 256 | 4        | 4        | 16         | 32         | 128        | 256        | 32    | >1024    |
| Y233     | >1024                    | >1024    | 128 | 128      | >1024    | >1024      | 512        | >1024      | >1024      | >1024 | >1024    |
| JY233    | >1024                    | >1024    | 128 | 128      | >1024    | 256        | 2          | 128        | 256        | 128   | 4        |
| Y243     | 128                      | 512      | 128 | 8        | 16       | 256        | 32         | >1024      | >1024      | 1024  | >1024    |
| JY243    | 64                       | 512      | 256 | 4        | 4        | 16         | 32         | 128        | 256        | 32    | >1024    |

**Table S3, continued**

| Strains* | MIC ( $\mu\text{g/mL}$ ) |       |     |          |          |       |      |       |       |       |       |
|----------|--------------------------|-------|-----|----------|----------|-------|------|-------|-------|-------|-------|
|          | GEN                      | KAN   | STR | SPE      | AMK      | TOB   | NEO  | SIS   | MCR   | NET   | RIB   |
| Y249     | 128                      | 128   | 128 | 8        | 16       | 128   | 4    | 1024  | >1024 | 256   | 512   |
| JY249    | 32                       | 32    | 256 | 4        | 16       | 32    | 1    | 128   | 256   | 32    | 128   |
| Y261     | 64                       | 256   | 128 | 16       | 8        | 64    | 16   | 256   | 512   | 64    | 1024  |
| JY261    | 64                       | 512   | 256 | 4        | 4        | 32    | 32   | 128   | 256   | 32    | >1024 |
| Y315     | 256                      | 256   | 128 | 16       | 8        | 128   | 16   | 1024  | 1024  | 64    | 1024  |
| JY315    | 64                       | 512   | 256 | 4        | 4        | 32    | 32   | 64    | 128   | 32    | >1024 |
| Y324     | 128                      | 128   | 128 | 16       | 16       | 64    | 2    | 256   | 512   | 64    | 512   |
| JY324    | 64                       | 64    | 256 | 4        | 4        | 32    | 1    | 128   | 128   | 32    | 128   |
| Y327     | 128                      | 64    | 128 | 16       | 8        | 64    | 2    | 256   | 512   | 64    | 512   |
| JY327    | 64                       | 64    | 256 | 4        | 2        | 16    | 1    | 128   | 128   | 16    | 64    |
| Y3       | 64                       | 512   | 128 | 16       | 8        | 64    | 16   | 256   | 512   | 64    | 1024  |
| Y7       | 128                      | 512   | 512 | 8        | 16       | 64    | 32   | 256   | 512   | 128   | 1024  |
| Y137     | 128                      | 256   | 128 | 16       | 8        | 64    | 32   | 256   | 512   | 64    | 1024  |
| Y150     | 128                      | 512   | 128 | 8        | 8        | 64    | 64   | 256   | 512   | 64    | >1024 |
| Y176     | 128                      | 256   | 64  | 4        | 8        | 128   | 64   | 256   | 1024  | 64    | >1024 |
| Y178     | 256                      | 512   | 128 | 16       | 8        | 64    | 64   | 512   | 1024  | 128   | >1024 |
| Y184     | 64                       | 256   | 64  | $\leq 1$ | 8        | 64    | 16   | 256   | 512   | 64    | 1024  |
| Y274     | >1024                    | >1024 | 128 | 64       | >1024    | >1024 | 1024 | >1024 | >1024 | >1024 | >1024 |
| Y295     | 128                      | 512   | 128 | 16       | 8        | 128   | 32   | 512   | 512   | 128   | >1024 |
| Y308     | 128                      | 64    | 128 | 8        | 16       | 64    | 2    | 256   | 512   | 64    | 512   |
| Y320     | 64                       | 256   | 128 | 16       | $\leq 1$ | 8     | 16   | 128   | 512   | 0.5   | 512   |
| Y323     | 128                      | 256   | 128 | 512      | 8        | 64    | 16   | 256   | 512   | 64    | 1024  |
| Y2152    | 64                       | 128   | 128 | 4        | $\leq 1$ | 4     | 16   | 128   | 256   | 1     | 512   |

\* The name of the strains starting with J represents transconjugants.

Abbreviations: GEN, gentamicin; KAN, kanamycin; STR, streptomycin; SPE, spectinomycin; AMK, amikacin; TOB, tobramycin; NEO, neomycin; SIS, sisomicin; MCR, micromonicin; NET, netilmicin; RIB, ribostamycin.

**Table S4.** Key genomic features of the three whole-genome sequenced *E. cloacae* complex isolates

| Characteristic          | Y233 (Accession no. CP049046.1)                                                                                                                                                                                                                                                                                                                                                                                                                                                                             | Y323 (Accession no. CP049188.1)                                                                                                                                                                                                                                                                                                                                                                                                                                                     | Y2152 (Accession no. CP049192.1)                                                                                                                                                                                                                                                                                   |
|-------------------------|-------------------------------------------------------------------------------------------------------------------------------------------------------------------------------------------------------------------------------------------------------------------------------------------------------------------------------------------------------------------------------------------------------------------------------------------------------------------------------------------------------------|-------------------------------------------------------------------------------------------------------------------------------------------------------------------------------------------------------------------------------------------------------------------------------------------------------------------------------------------------------------------------------------------------------------------------------------------------------------------------------------|--------------------------------------------------------------------------------------------------------------------------------------------------------------------------------------------------------------------------------------------------------------------------------------------------------------------|
| Species or subspecies   | <i>E. hormaechei</i> subsp. <i>steigerwaltii</i>                                                                                                                                                                                                                                                                                                                                                                                                                                                            | <i>E. hormaechei</i> subsp. <i>oharae</i>                                                                                                                                                                                                                                                                                                                                                                                                                                           | <i>E. hormaechei</i> subsp. <i>oharae</i>                                                                                                                                                                                                                                                                          |
| MLST                    | ST461                                                                                                                                                                                                                                                                                                                                                                                                                                                                                                       | ST303                                                                                                                                                                                                                                                                                                                                                                                                                                                                               | ST303                                                                                                                                                                                                                                                                                                              |
| Genome size (bp)        | 4,719,755                                                                                                                                                                                                                                                                                                                                                                                                                                                                                                   | 4,782,705                                                                                                                                                                                                                                                                                                                                                                                                                                                                           | 4783459                                                                                                                                                                                                                                                                                                            |
| GC content (%)          | 55.56                                                                                                                                                                                                                                                                                                                                                                                                                                                                                                       | 55.27                                                                                                                                                                                                                                                                                                                                                                                                                                                                               | 55.27                                                                                                                                                                                                                                                                                                              |
| No. of coding sequences | 4347                                                                                                                                                                                                                                                                                                                                                                                                                                                                                                        | 4366                                                                                                                                                                                                                                                                                                                                                                                                                                                                                | 4415                                                                                                                                                                                                                                                                                                               |
| No. of plasmids         | 3                                                                                                                                                                                                                                                                                                                                                                                                                                                                                                           | 3                                                                                                                                                                                                                                                                                                                                                                                                                                                                                   | 3                                                                                                                                                                                                                                                                                                                  |
| No. of tRNA genes       | 86                                                                                                                                                                                                                                                                                                                                                                                                                                                                                                          | 84                                                                                                                                                                                                                                                                                                                                                                                                                                                                                  | 84                                                                                                                                                                                                                                                                                                                 |
| No. of rRNA genes       | 25                                                                                                                                                                                                                                                                                                                                                                                                                                                                                                          | 25                                                                                                                                                                                                                                                                                                                                                                                                                                                                                  | 25                                                                                                                                                                                                                                                                                                                 |
| Resistance gene(s)      |                                                                                                                                                                                                                                                                                                                                                                                                                                                                                                             |                                                                                                                                                                                                                                                                                                                                                                                                                                                                                     |                                                                                                                                                                                                                                                                                                                    |
| Chromosome              | <i>bla</i> <sub>ACT-17</sub> , <i>fosA7</i>                                                                                                                                                                                                                                                                                                                                                                                                                                                                 | <i>bla</i> <sub>ACT-25</sub> , <i>fosA7</i> , <i>mcr-9</i>                                                                                                                                                                                                                                                                                                                                                                                                                          | <i>bla</i> <sub>ACT-25</sub> , <i>fosA7</i> , <i>mcr-9</i>                                                                                                                                                                                                                                                         |
| Plasmids                | pIH12-233 (322.325 kb): <i>aphA-1</i> ,<br><i>catII</i> , <i>tet(D)</i> , <i>mcr-9</i> , <i>dfrA19</i> , <i>strA</i> , <i>strB</i> ,<br><i>aac(6')-IIc</i> , <i>ereA2</i> , <i>sul1</i> , <i>qnrB4</i> ,<br><i>bla</i> <sub>DHA-1</sub> , <i>bla</i> <sub>TEM-1</sub> , <i>bla</i> <sub>SHV-12</sub> , <i>aac(6')-Ib</i> ,<br><i>aac(3)-IIg</i><br>p233-142 (142.557 kb): <i>bla</i> <sub>TEM-1</sub> ,<br><i>aadA1</i> , <i>sul1</i> , <i>armA</i> , <i>msr(E)</i> , <i>mph(E)</i><br>p233-2 (2.507 kb): - | pIH12-323 (394.232 kb): <i>aphA-1</i> , <i>catII</i> ,<br><i>tet(D)</i> , <i>mph(A)</i> , <i>mcr-9</i> , <i>dfrA19</i> , <i>strA</i> , <i>strB</i> ,<br><i>aac(6')-IIc</i> , <i>ereA2</i> , <i>sul1</i> , <i>qnrB4</i> , <i>bla</i> <sub>DHA-1</sub> ,<br><i>bla</i> <sub>TEM-1</sub> , <i>bla</i> <sub>SHV-12</sub> , <i>bla</i> <sub>SFO-1</sub> , <i>aac(6')-Ib</i> ,<br><i>aac(3)-IIId</i> , <i>aadA2</i> , <i>aac(3)-IIg</i><br>pY323-2 (5.976 kb): -<br>pY323-3 (2.495 kb): - | pIH12-2152 (303.394 kb): <i>aphA-1</i> ,<br><i>catII</i> , <i>tet(D)</i> , <i>mcr-9</i> , <i>dfrA19</i> , <i>strA</i> , <i>strB</i> ,<br><i>aac(6')-IIc</i> , <i>ereA2</i> , <i>sul1</i> , <i>qnrB4</i> ,<br><i>bla</i> <sub>DHA-1</sub> , <i>aac(3)-IIg</i><br>pDC2152-6 (5.976 kb): -<br>pDC2152-2 (2.495 kb): - |

**Table S5.** The *aac(3)-IIg*-containing sequences in the NCBI nucleotide database were from 34 species

| Organisms                                                                  | Number |
|----------------------------------------------------------------------------|--------|
| <i>Enterobacterales</i>                                                    | 33     |
| <i>Enterobacteriaceae</i>                                                  | 31     |
| <i>Enterobacter cloacae</i> complex                                        | 12     |
| <i>Enterobacter hormaechei</i>                                             | 4      |
| <i>Enterobacter cloacae</i>                                                | 5      |
| <i>Enterobacter hormaechei</i> subsp <i>hoffmannii</i>                     | 1      |
| <i>Enterobacter asburiae</i>                                               | 1      |
| <i>Enterobacter hormaechei</i> subsp <i>steigerwaltii</i>                  | 1      |
| <i>Klebsiella aerogenes</i>                                                | 1      |
| <i>Salmonella enterica</i> subsp <i>enterica</i>                           | 1      |
| <i>Klebsiella quasipneumoniae</i> subsp <i>quasipneumoniae</i>             | 1      |
| <i>Citrobacter freundii</i>                                                | 1      |
| <i>Escherichia coli</i>                                                    | 1      |
| <i>Salmonella enterica</i> subsp <i>enterica</i> serovar                   | 1      |
| <i>Salmonella enterica</i> subsp <i>enterica</i> serovar <i>Braenderup</i> | 1      |
| <i>Cronobacter sakazakii</i>                                               | 2      |
| <i>Salmonella enterica</i>                                                 | 2      |
| <i>Klebsiella pneumoniae</i>                                               | 1      |
| <i>Salmonella enterica</i> subsp <i>enterica</i> serovar <i>Concord</i>    | 1      |
| <i>Citrobacter farmeri</i>                                                 | 1      |
| <i>Salmonella enterica</i> subsp <i>enterica</i> serovar <i>Newport</i>    | 1      |
| <i>Salmonella enterica</i> subsp <i>enterica</i> serovar <i>Heidelberg</i> | 1      |
| <i>Klebsiella pneumoniae</i> subsp <i>pneumoniae</i>                       | 1      |
| <i>Citrobacter braakii</i>                                                 | 1      |
| <i>Klebsiella oxytoca</i>                                                  | 1      |
| <i>Providencia stuartii</i>                                                | 1      |
| <i>Phytobacter ursingii</i>                                                | 1      |
| <i>Aeromonas veronii</i>                                                   | 1      |



**Table S6.** Cluster analysis of the 34 *aac(3)-IIg*-containing sequences

| Clusters  | GenBank accession no.   | Identity (%) <sup>a</sup> |
|-----------|-------------------------|---------------------------|
| Cluster 1 | CP049193.1 (pIH12-2152) | *                         |
| Cluster 1 | CP049189.1 (pIH12-323)  | 99.88                     |
| Cluster 1 | CP049047.1 (pIH12-233)  | 82.74                     |
| Cluster 1 | CP014775.1              | 88.79                     |
| Cluster 1 | KY978628.1              | 97.03                     |
| Cluster 1 | CP028537.1              | 99.93                     |
| Cluster 1 | LT994835.1              | 99.68                     |
| Cluster 1 | MH399264.1              | 88.6                      |
| Cluster 1 | CP028975.1              | 99.94                     |
| Cluster 1 | CP040696.1              | 88.91                     |
| Cluster 1 | CP043927.1              | 83.44                     |
| Cluster 1 | CP044075.1              | 88.87                     |
| Cluster 2 | EU855787.1              | *                         |
| Cluster 2 | EU855788.1              | 88.42                     |
| Cluster 2 | CP011601.1              | 88.62                     |
| Cluster 2 | CP012170.1              | 89.14                     |
| Cluster 2 | KY863418.1              | 99.99                     |
| Cluster 2 | CP027144.1              | 88.79                     |
| Cluster 2 | CP028197.1              | 100                       |
| Cluster 2 | CP031568.1              | 88.4                      |
| Cluster 2 | CP032842.1              | 85.91                     |
| Cluster 2 | MK191835.1              | 88.56                     |
| Cluster 2 | MK191844.1              | 88.4                      |
| Cluster 2 | CP040382.1              | 85.49                     |
| Cluster 2 | CP042552.1              | 86.98                     |
| Cluster 3 | CP013215.1              | *                         |
| Cluster 3 | CP022695.1              | 86.57                     |
| Cluster 4 | CP016526.1              | *                         |
| Cluster 4 | CP012599.1              | 85.31                     |
| Cluster 5 | MF344580.1              | *                         |
| Cluster 6 | CP028197.1              | *                         |
| Cluster 7 | CP030186.1              | *                         |
| Cluster 8 | CP044177.1              | *                         |
| Cluster 8 | CP044215.1              | 80.42                     |

<sup>a</sup> Percent identity when compared with the reference sequence in the same cluster.

\* Reference sequence for the cluster analysis.
